# Supplementary material
Source: PubMed Central journal article supplement (PMC8108702)
Supplement: NIHMS1681887-supplement-Appendix_A_Supplementary_material.pdf [file NIHMS1681887-supplement-Appendix_A_Supplementary_material.pdf]

## **Supplementary Material 1**

### **In solution analysis (shotgun)**

#### **Protein identification by mass spectrometry analysis.**

Lyophilized samples containing intra and extracellular proteins were reconstituted in a solution to achieve a final concentration of 50mM Tris-HCl pH 8.0 and 1  $\mu\text{g } \mu\text{L}^{-1}$  of final protein concentration. Protein reduction and alkylation were carried out using DTT (Sigma-Aldrich, Saint Louis, MO) at 65 °C for 5 min, followed by Iodoacetamide (Sigma-Aldrich, Saint Louis, MO) at room temperature and in the absence of light for 30 min. The samples were in solution-digested with Trypsin (Promega, Madison, WI) in 1:40 ratio ( $\mu\text{g}$  Trypsin:  $\mu\text{g}$  Protein) at 37 °C overnight. The reaction was stopped by changing to pH 4 with Trifluoroacetic Acid (Sigma-Aldrich, Saint Louis, MO) at 0.5% final concentration. The tryptic digested peptides were concentrated with a centrifugal concentrator (SpeedVac, Thermo Savant) and reconstituted in Water/Acetonitrile/Trifluoroacetic Acid (97/3/0.05%).

The digested peptides were separated by Ultra Performance Liquid Chromatography on a nano scale (nanoUHPLC) using Dionex Ultimate 3000 nanoRS UHPLC (Thermo Scientific, Bremen, Germany). The peptides were captured and in-line desalted using the column Acclaim PepMap 100, 75  $\mu\text{m}$  diameter and 2 cm length, nanoViper C18, 3  $\mu\text{m}$ , 100 Å (Thermo Scientific) with a 6  $\mu\text{L min}^{-1}$  flow for 5 min, using Water/Acetonitrile/Trifluoroacetic Acid (97/3/0.05%) as the mobile phase. Then, the analytical procedure consisted of using mobile phases A (Water/Acetonitrile/Formic Acid 98/2/0.05%) and B (Water/Acetonitrile/Formic Acid 20/80/0.05%), and the column Acclaim PepMap 100, 75  $\mu\text{m}$  diameter and 150 mm length, nanoViper C18, 2  $\mu\text{m}$ , 100 Å (Thermo Scientific). The standard gradient was: 0-4 min, 1.2% B isocratic for 4 min, then 4-35 min 3-98% B linear for 40 min, followed by A:B (98/2%) to balance. The total run time was 50 min at 300 nL  $\text{min}^{-1}$  flow.

At the end of the separation, the peptides were analyzed using an Orbitrap FT QExactive Plus quadrupole mass spectrometer (Thermo Scientific, Bremen, Germany) with a nano-scale Electrospray ionization source (nanoESI). The data acquisition method was based on the full precursor search (Full-MS) followed by precursor-dependent data acquisition ddMS2 (DDA), for 50 min (MS/MS) (Kelstrup et al., 2012; Sun et al., 2013; Liu et al., 2020). Mascot Distiller v2.6.2.0 ([www.matrixscience.com](http://www.matrixscience.com)) and Proteome Discoverer v2.1 (Thermo Scientific) were used to generate the file or list of generic masses or peaks (MGF). The

considered ion precursor charge was +1 or multiple charges, generated from the RAW data folder. The assigned mass range for the acquisition of precursors (MS) and fragments (MS/MS) was 300-1800 Da (resolution @70000) and 65-2000 Da (resolution @17500), respectively.

1. Kelstrup CD, Young C, Lavalley R, Nielsen ML, Olsen JV (2012). Optimized Fast and Sensitive Acquisition Methods for Shotgun Proteomics on a Quadrupole Orbitrap Mass Spectrometer. *J Proteome Res* 11(6): 3487-3497
2. Liu Y, Min JW, Feng S, Subedi K, Qiao F, Mammenga E, et al. (2020). Therapeutic role of a cysteine precursor, OTC, in ischemic stroke is mediated by improved proteostasis in mice. *Transl Stroke Res* 11(1):147-160
3. Sun L, Zhu G, Dovichi NJ (2013). Comparison of LTQ-Orbitrap Velos and Q-Exactive for proteomic analysis of 1-1000 ng RAW 264.7 cells lysate digests. *Rapid Commun Mass Spectrom* 27(1): 157-162
